# Supplementary material for: Combined topographic, spectroscopic, and model analyses of inhomogeneous energetic coupling of linear light harvesting complex II aggregates in native photosynthetic membranes
Source: Royal Society of Chemistry journal article supplement (doi:10.1039/c3cp43582b), 2013-01-01

## Supporting Information

# Combined Topographic, Spectroscopic, and Model Analyses of Inhomogeneous Energetic Coupling of Linear Light Harvesting Complex II Aggregates in Native Photosynthetic Membrane

Suneth P. Rajapaksha, Yufan He, H. Peter Lu\*

Department of Chemistry and Center for Photochemical Sciences, Bowling Green State University, Bowling Green, OH 43403

\*Corresponding Author: H. Peter Lu, [hplu@bgsu.edu](mailto:hplu@bgsu.edu); 419-372-1840

### S1. Bacterial Growth and Purification:

The bacterial cells were grown with purging a gas mixture of 95% N<sub>2</sub> and 5% CO<sub>2</sub> and harvested when the absorption reach 0.5 O.D. at 600 nm ( $A_{600\text{ nm}}$ ). Membrane fragment vesicles were separated on a Sepharose 2B column (50 × 2.0 cm) and then purifies by rate-zonal sucrose gradient centrifugation at 63500 × g for 10 hours. Membranes were isolated by ultracentrifugation at 260000 × g for 1 hour. The isolated membranes were dissolved in 20 mM Tris-HCl buffer at pH 8.0 containing 100 mM NaCl and 1% Lauryl *N,N*-dimethylamine-*N*-oxide (LDAO) for the isolation of LH2 complexes by DEAE-52 cellulose chromatography and 20-40% sucrose gradient centrifugation at 260000 × g for 16 hours at 4 °C. Purified membrane fragment vesicles and LH2 complexes were stored at -80 °C.

### S2. Sample Preparation and AFM Imaging:

The photosynthetic membrane fragments were adsorbed on a freshly cleaved mica surface (Ted Pella, Inc., CA) for AFM imaging. The surface of the mica was first rinsed with 25 mM  $\text{MgCl}_2$  solution to change the surface charge from negative to positive to ensure the firm attachment of the membrane fragments on the mica surface. A drop of adsorption buffer (10 mM Tris-HCl at pH 7.5, 150 mM KCl, 25 mM  $\text{MgCl}_2$ ) was applied on the mica surface and then 2  $\mu\text{L}$  of purified membrane solution was injected into it. After 1-1.5 hours incubation, the surface was gently rinsed with a buffer (10 mM Tris-HCl at pH 7.5, 150 mM KCl) to remove multilayer membrane patches, if exist, from the surface of the mica.

We used a closed-loop multipurpose AFM scanner (Agilent 5500 SPM microscope, Agilent Technologies) and an ultra sharp AFM silicon tip (Mikromasch) having a  $0.6 \text{ Nm}^{-1}$  spring constant and  $\sim 75 \text{ kHz}$  resonant frequency to record tapping-mode AFM images. All of the images were recorded in ambient condition at 1-2 Hz line scanning frequency with  $512 \times 512 \text{ pixels}^2$  resolution. We compared the unchanged feathers of the same imaging area of same membrane sample in the consecutive images to ensure the non-modification by scanning operation.

### **S3. Confocal Fluorescence Microscopy:**

The membrane fragments and purified LH2 samples were excited using 795 nm pulse laser (100 fs pulses at a repetition rate of 76 MHz, Ti:sapphire laser system, Mira 900, Coherent) with average incident power of 3-4  $\mu\text{W}$ . The fluorescence images of LH2 were recorded with an inverted confocal microscope (Axiovert-200, Zeiss). A dichroic

mirror (815 dclp, Chroma Technology) was used to direct the laser beam to the sample via a high numerical aperture objective (1.3 NA, 63 $\times$ , oil immersion, Zeiss). The sample was spin-coated on a microscope coverslip (0.17 mm thickness, 18  $\times$  18 mm<sup>2</sup> size, Gold Seal), and raster scanned with respect to the laser focus by a x-y electropiezo closed-loop scanning stage (H100, Mad City Lab) for imaging. The emitted fluorescence was collected by the same objective before filtering from a long pass filter (HQ825LP, Chroma Technology). For both imaging and lifetime measurements, two Si avalanche photodiode single photon counting modules were used (SPCM-AQR-14, PerkinElmer and MPD, Micro Photon Devices) as the detectors. The fluorescence images (100 $\times$ 100 pixels<sup>2</sup>) acquired by continuous raster scanning the sample at the rate of 4 ms/pixel.

#### **S4. Ensemble Average Spectroscopic Measurements:**

A VARIAN Cary 50 Scan UV-Visible Spectrophotometer and a Quantamaster NIR Fluorometer (Photon Technology International) were used to record the ensemble-averaged absorption and emission spectra, respectively.

**Additional AFM images to show the linearly aggregated light harvesting complex II (LH2) proteins on the photosynthetic membrane**

These images are recorded following the similar experimental procedure and under the same experimental conditions described in S2.

**Figure S1:** AFM images of light harvesting complex II in photosynthetic membranes from *Rhodobacter sphaeroides* (Strain 2.4.1)

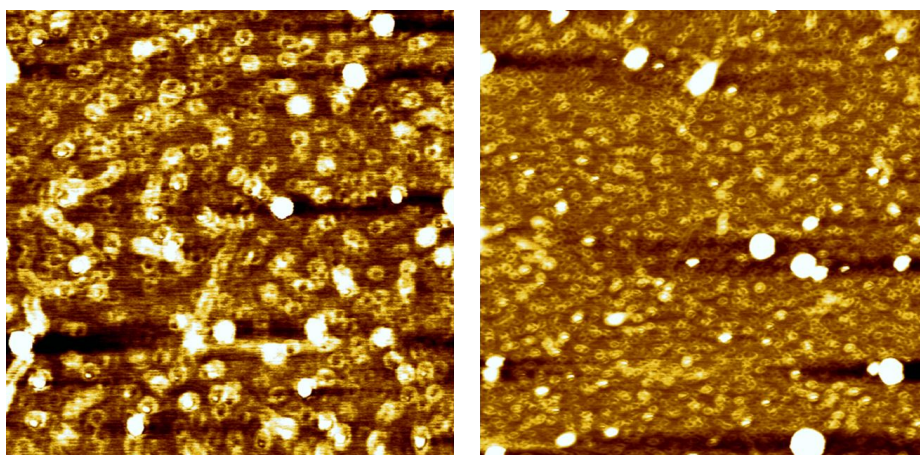

**Figure S2:** AFM images of light harvesting complex II in photosynthetic membranes from *Rhodobacter sphaeroides* (Strain ATCC17025)

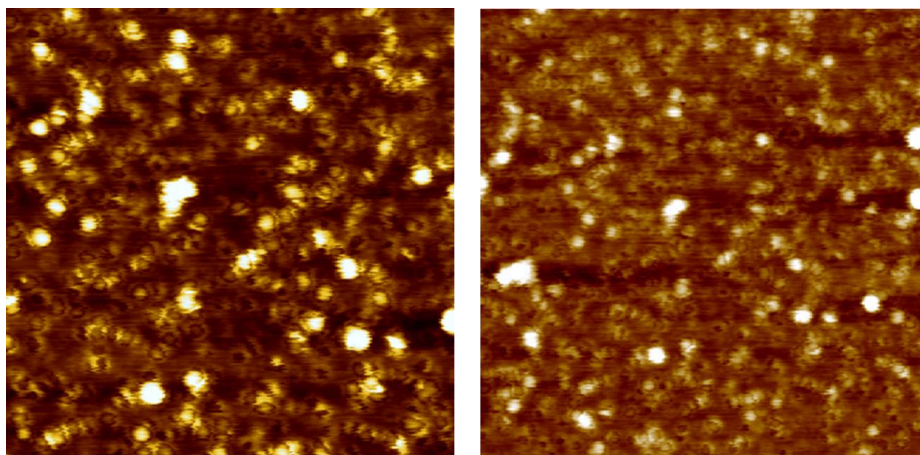

**Figure S3:** AFM images of light harvesting complex II in photosynthetic membranes from *Rhodospirillum rubrum*.

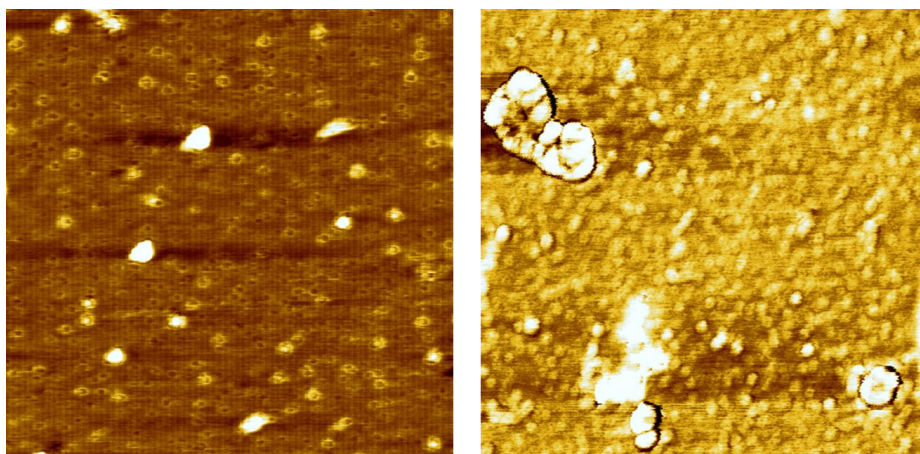

Supplement: c3cp43582b.pdf [file c3cp43582b.pdf]
